# Supplementary material
Source: Springer Nature journal article supplement (https://www.springermedizin.de/resource/supplementary/12990_2008_202_MOESM5_ESM.pdf/9612776)

**A**

Vehicle

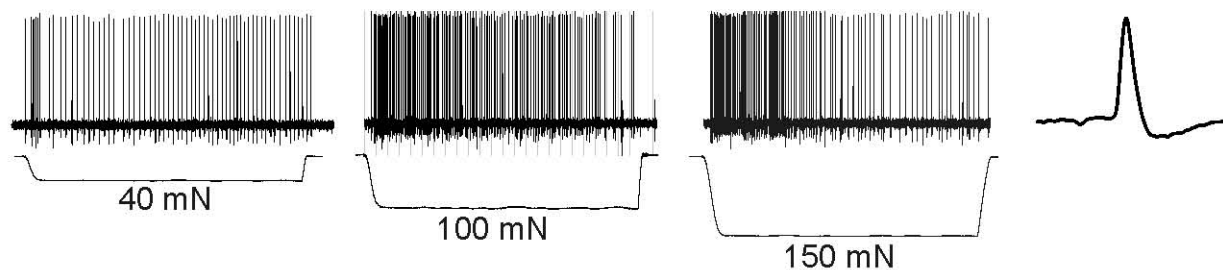

HC-030031

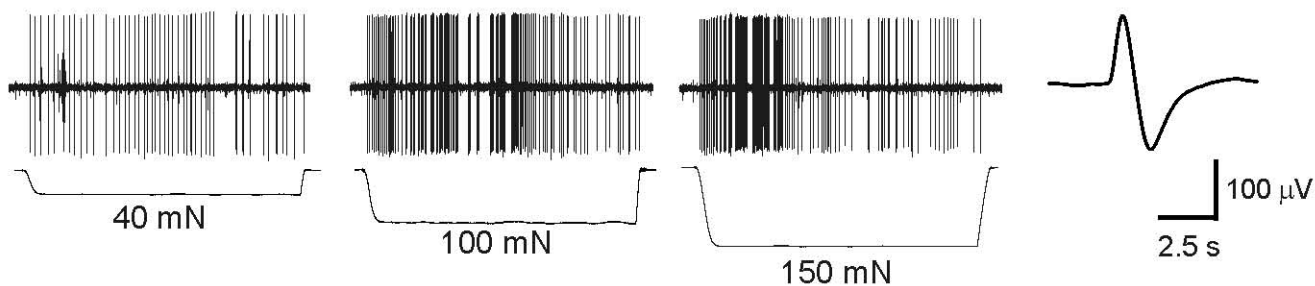**B**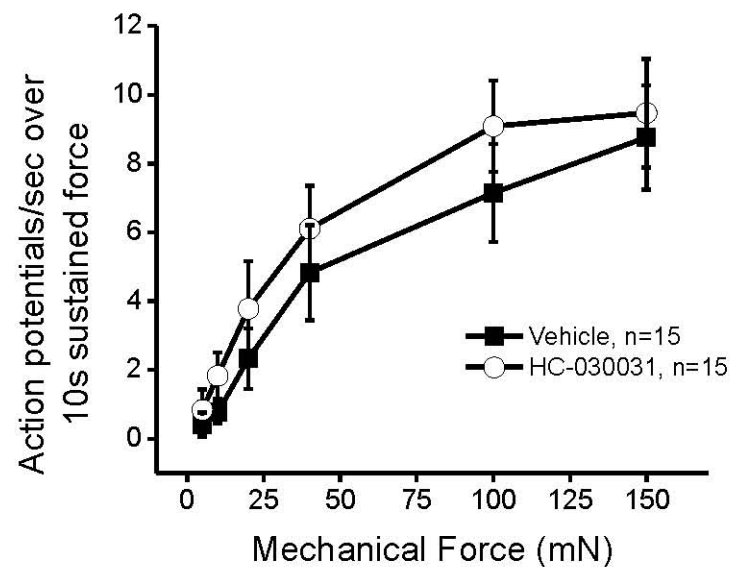**C**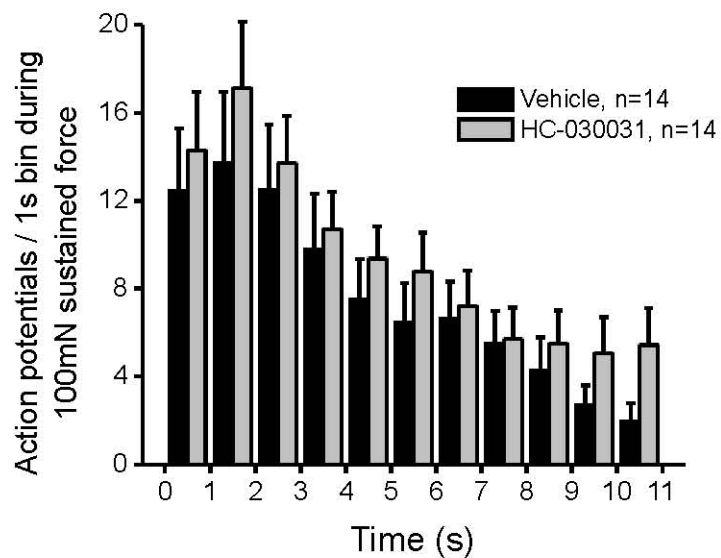

Supplement: MOESM5 [file 9612776]
